# Supplementary material
Source: Springer Nature journal article supplement (https://www.springermedizin.de/resource/supplementary/12943_2013_1214_MOESM11_ESM.pdf/9552416)

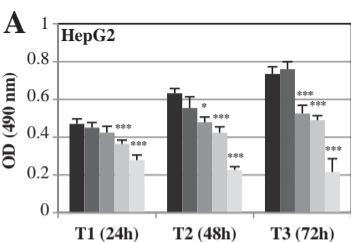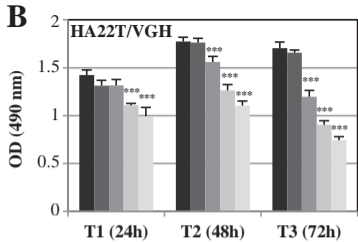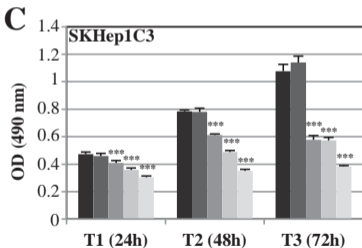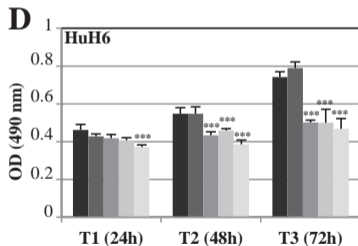

Untreated  
 0.1% DMSO

5  $\mu$ M sorafenib  
 10  $\mu$ M sorafenib  
 15  $\mu$ M sorafenib

Supplement: MOESM11 [file 9552416]
